# Supplementary material for: Hierarchically structured 3D carbon nanotube electrodes for electrocatalytic applications
Source: publisher site journal article supplement (doi:10.3762/bjnano.10.146), 2019-07-24
Supplement: Additional file 1 [file 2190-4286-10-146-S1.pdf]

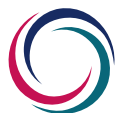

## Supporting Information

for

### **Hierarchically structured 3D carbon nanotube electrodes for electrocatalytic applications**

Pei Wang, Katarzyna Kulp and Michael Bron

*Beilstein J. Nanotechnol.* **2019**, *10*, 1475–1487. [doi:10.3762/bjnano.10.146](https://doi.org/10.3762/bjnano.10.146)

### **Additional SEM images and results of electrochemical characterization**

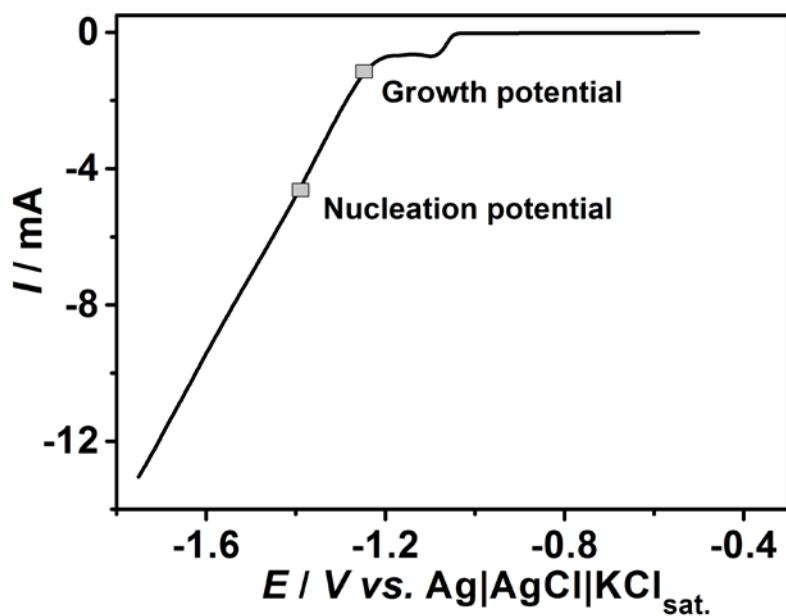

**Figure S1:** Single sweep voltammogram of iron deposition on oxidized GC recorded in the potential range between -0.5 V and -1.75 V vs Ag|AgCl|KCl<sub>sat.</sub> with a scan rate 5 mV s<sup>-1</sup> in N<sub>2</sub> purged 0.005 M FeSO<sub>4</sub> \* 7 H<sub>2</sub>O and 0.5 M MgSO<sub>4</sub> \* 7 H<sub>2</sub>O aqueous solution. The respective potentials for double-pulse deposition are indicated.

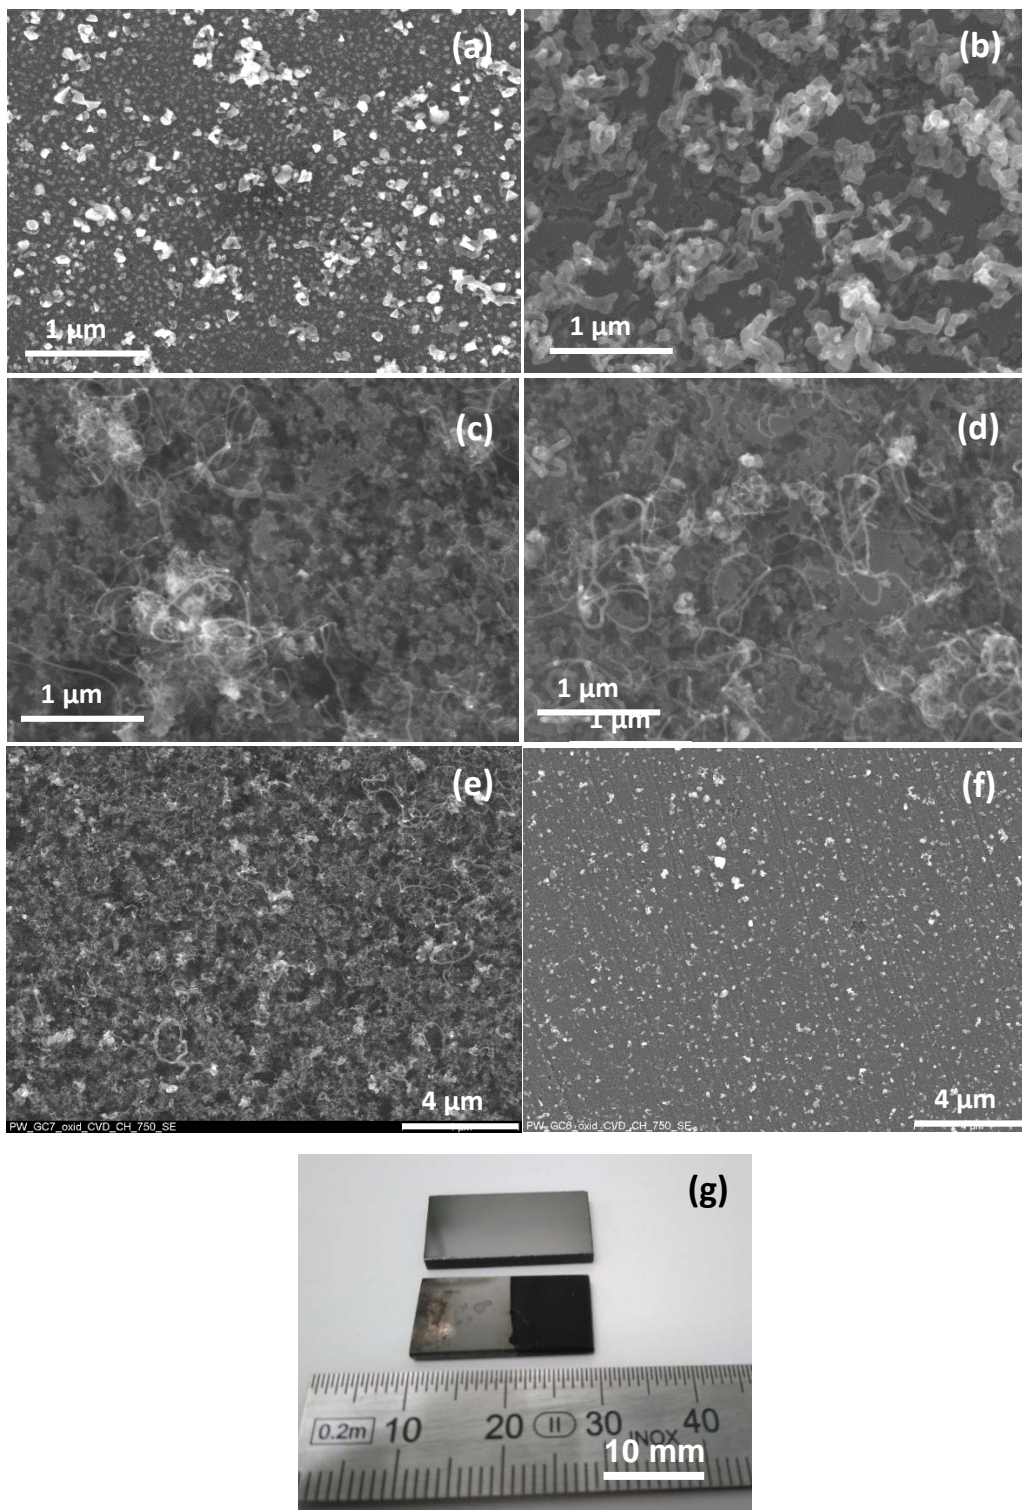

**Figure S2:** SEM images of CNTs grown at 750 °C using cyclohexane as carbon source through CVD with an H<sub>2</sub>/Ar ratio of 1.8: (a) for 30 min and (b) for 60 min using 1.7 L h<sup>-1</sup> as total gas flow rate; (c) with 6.7 L h<sup>-1</sup> as total gas flow rate and (d) 12.1 L h<sup>-1</sup> as flow rate for 120 min; as well as with a gas flow rate of 1.7 L h<sup>-1</sup> for 120 min with different H<sub>2</sub>/Ar ratios: (e) 1.4 (1.0 L h<sup>-1</sup>/0.7 L h<sup>-1</sup>), (f) 2.4 (1.2 L h<sup>-1</sup>/0.5 L h<sup>-1</sup>), (g) optical images of GC before and after CNTs growth for 120 min.

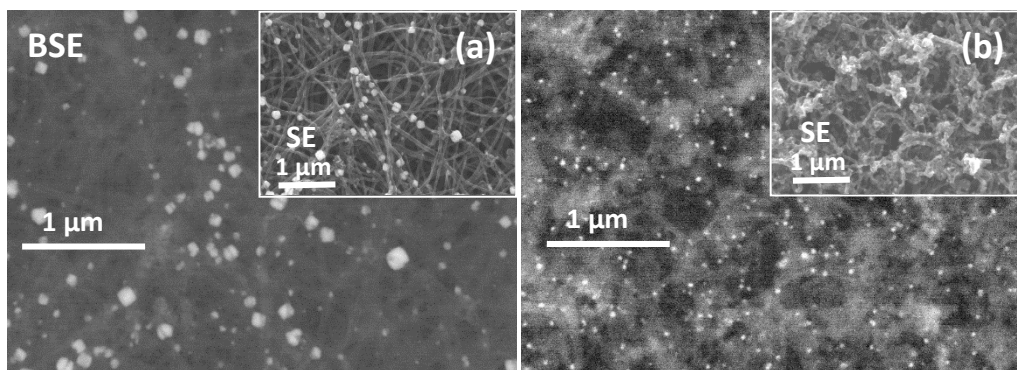

**Figure S3:** SEM and BSE images of Fe nanoparticles deposited onto primary CNTs on GC via the above mentioned electrochemical deposition with different deposition times: (a) 12 s and (b) 6 s.

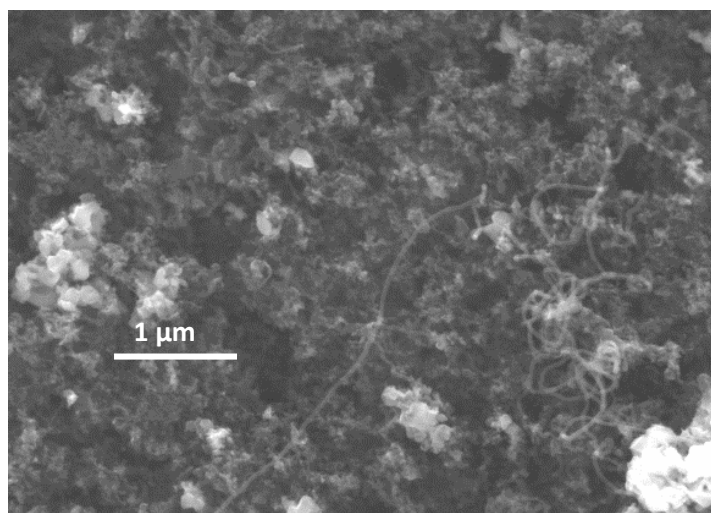

**Figure S4:** SEM images of secondary CNT growth at 750 °C for 120 min with optimized H<sub>2</sub>/Ar ratio of 1.8 (1.1 L h<sup>-1</sup>/ 0.6 L h<sup>-1</sup>).

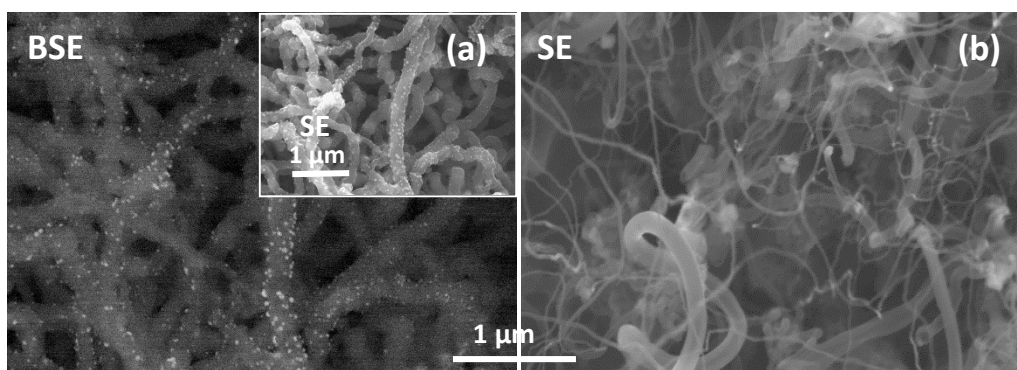

**Figure S5:** SEM and BSE images of (a) electrodeposited secondary Fe nanoparticles onto thicker CNTs and GC with 6 s deposition time as well as (b) secondary CNTs grown via optimized growth condition. (The CNTs with increased diameter were grown at bigger primary Fe nanoparticles created by longer deposition time.)

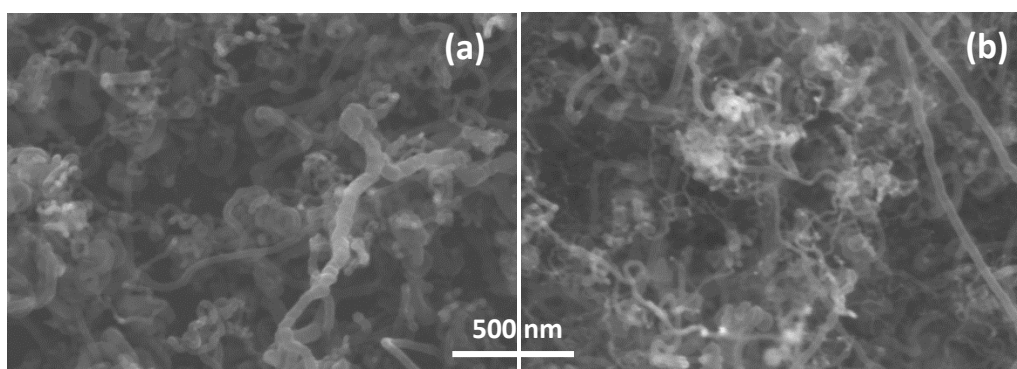

**Figure S6:** SEM images of CNTs before and after secondary CNT growth with acetonitrile as carbon source at 750 °C for 120 min.



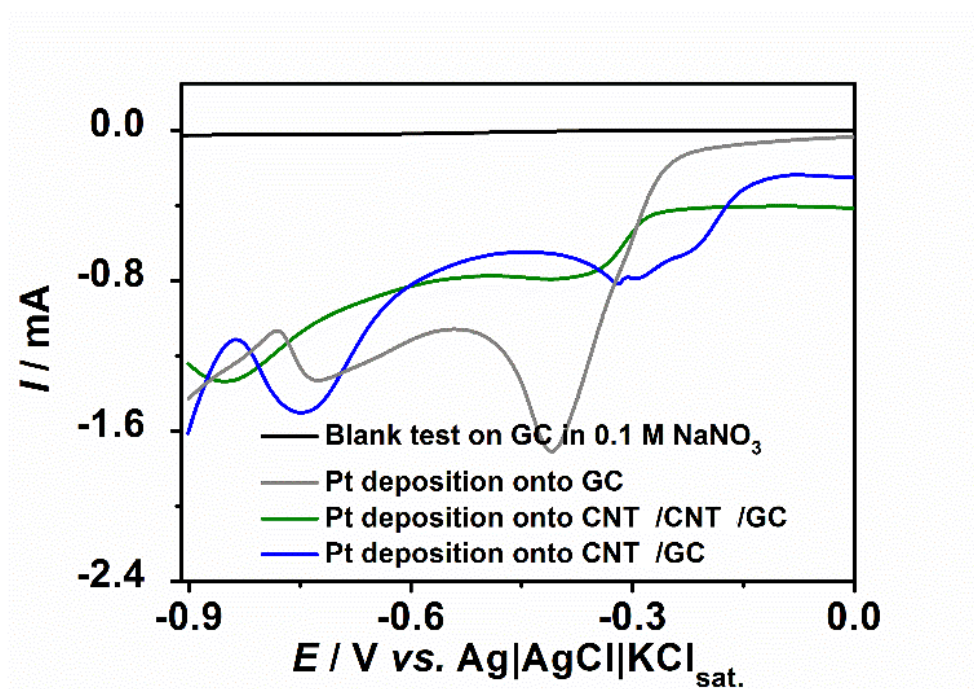

**Figure S7:** Linear sweep voltammogram for Pt deposition recorded at a scan rate of  $5 \text{ mV s}^{-1}$  from 0 to -0.9 V vs  $\text{Ag|AgCl|KCl}_{\text{sat.}}$  in a 0.005 M  $\text{Pt}(\text{NO}_3)_2$  and 0.1 M  $\text{NaNO}_3$  solution.

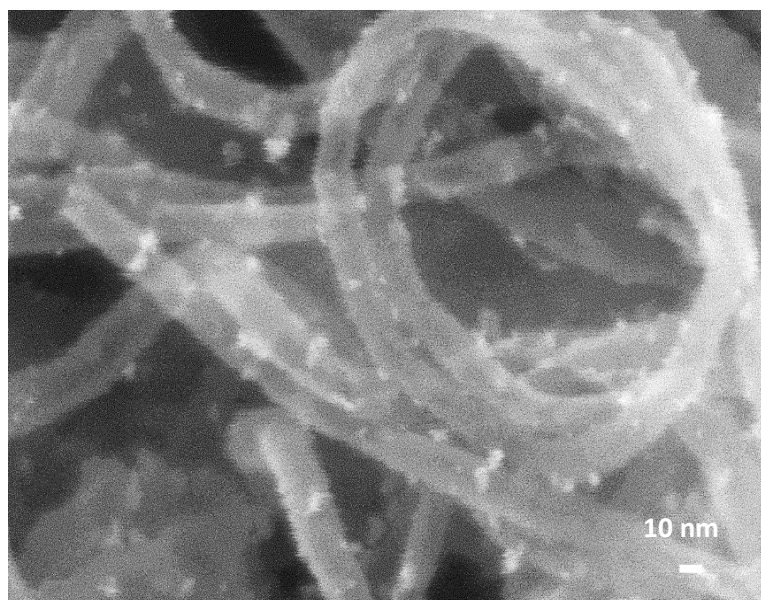

**Figure S8:** SEM images of Pt nanoparticles deposited onto CNT/CNT/Pt from a 0.005 M  $\text{Pt}(\text{NO}_3)_2$  and 0.1 M  $\text{NaNO}_3$  aqueous solution via linear-sweep voltammetry from 0 to -0.9 V vs.  $\text{Ag|AgCl|KCl}_{\text{sat.}}$  at  $5 \text{ mV s}^{-1}$  scan rate.

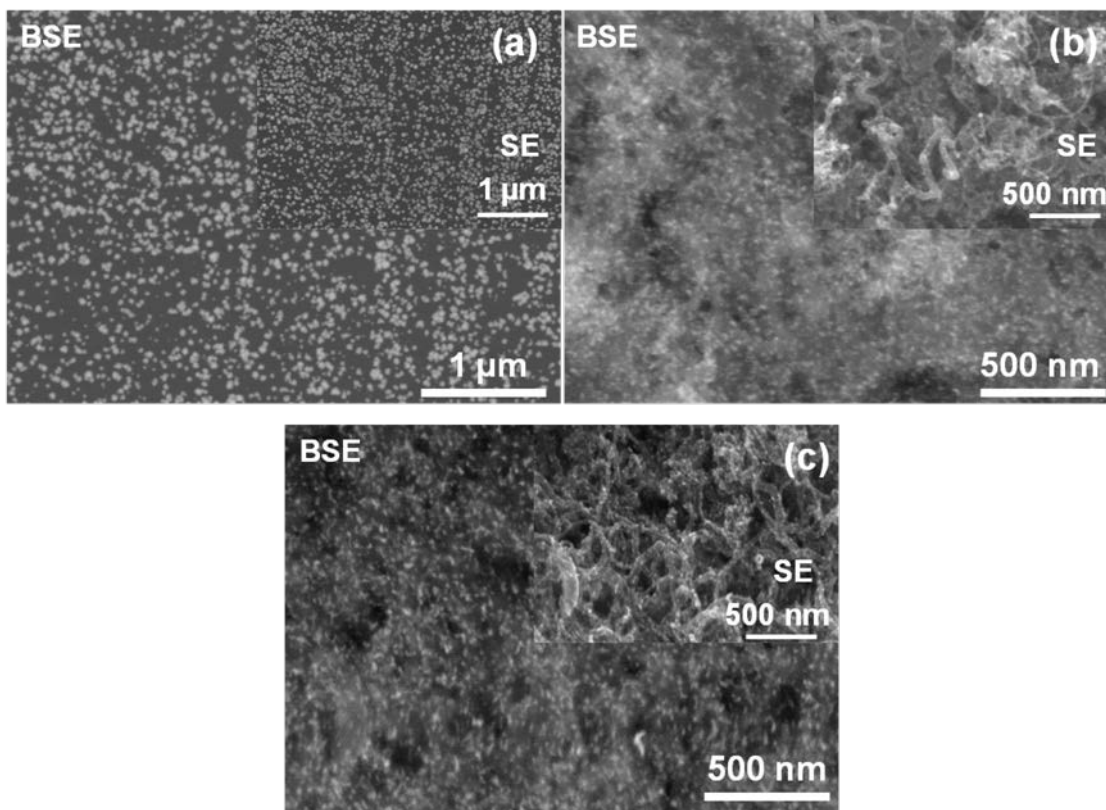

**Figure S9:** SEM und BSE images of Pt nanoparticles deposited from an aqueous 0.005 M  $\text{Pt}(\text{NO}_3)_2$  and 0.1 M  $\text{NaNO}_3$  solution via single-sweep voltammetry from 0 to -0.9 V vs.  $\text{Ag}|\text{AgCl}|\text{KCl}_{\text{sat}}$ . at a scan rate of  $5 \text{ mV s}^{-1}$  onto: (a) oxidized GC, (b) CNT/GC and (c) CNT/CNT/GC.

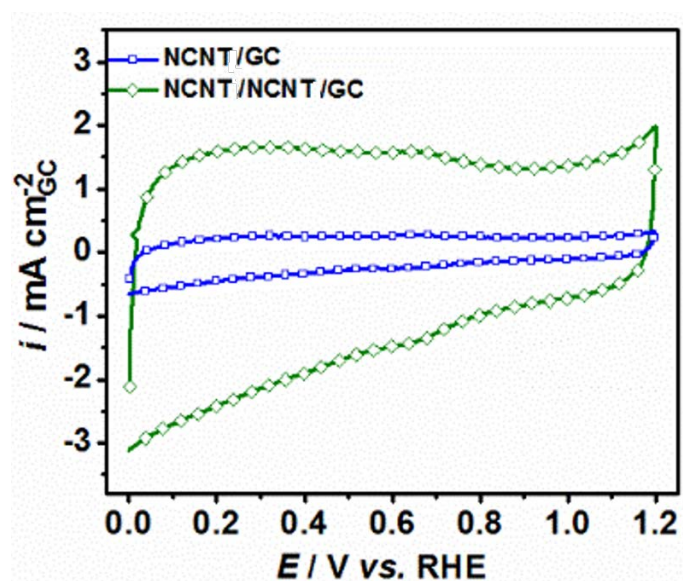

**Figure S10:** Cyclic voltammograms of NCNT/GC and NCTN/NCNT/GC electrodes recorded at a  $100 \text{ mV s}^{-1}$  scan rate in 0.5 M  $\text{H}_2\text{SO}_4$  aqueous solution purged with  $\text{N}_2$  at room temperature.

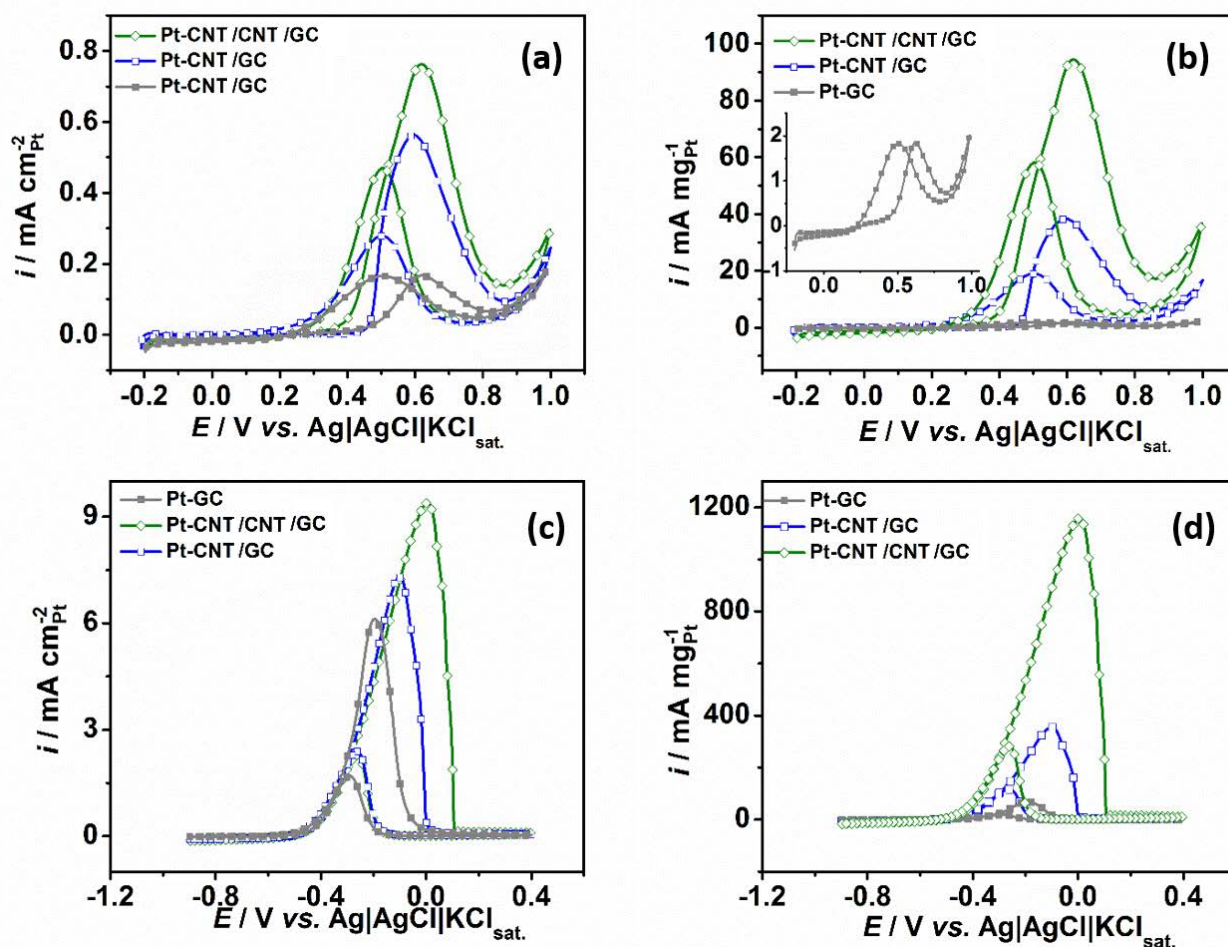

**Figure S11:** Cyclic voltammograms of Pt-GC, Pt-CNT/GC and Pt-CNT/CNT/GC recorded at a scan rate of  $5 \text{ mV s}^{-1}$  respectively normalized to Pt-ECSA evaluated by  $H_{\text{ads/des}}$  and Pt mass in the potential range from  $-0.2 \text{ V}$ – $1.0 \text{ V}$  vs.  $\text{Ag}|\text{AgCl}|\text{KCl}_{\text{sat}}$  in  $\text{N}_2$  purged  $1 \text{ M CH}_3\text{OH}$  and  $0.5 \text{ M H}_2\text{SO}_4$  solution (a,b) as well as in potential range of  $-0.9 \text{ V}$ – $0.4 \text{ V}$  in  $1 \text{ M CH}_3\text{OH}$  and  $0.5 \text{ M KOH}$  solution (c,d).
